# Supplementary material for: Hexokinase 2 is dispensable for T cell-dependent immunity
Source: PubMed Central journal article supplement (PMC6098591; doi:10.1186/s40170-018-0184-5), 2018-08-17

**Figure S1**

**a**

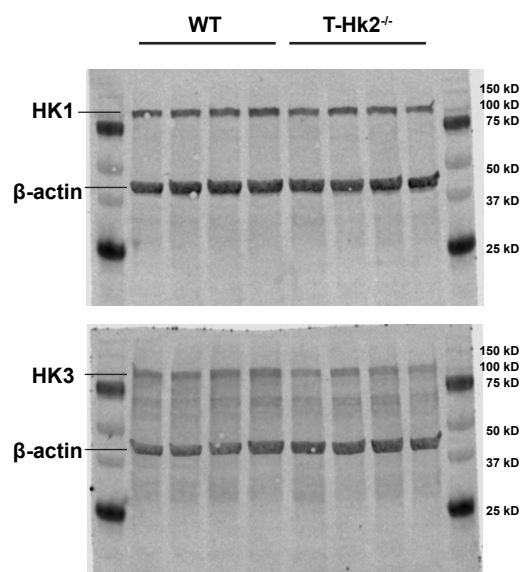

**b**

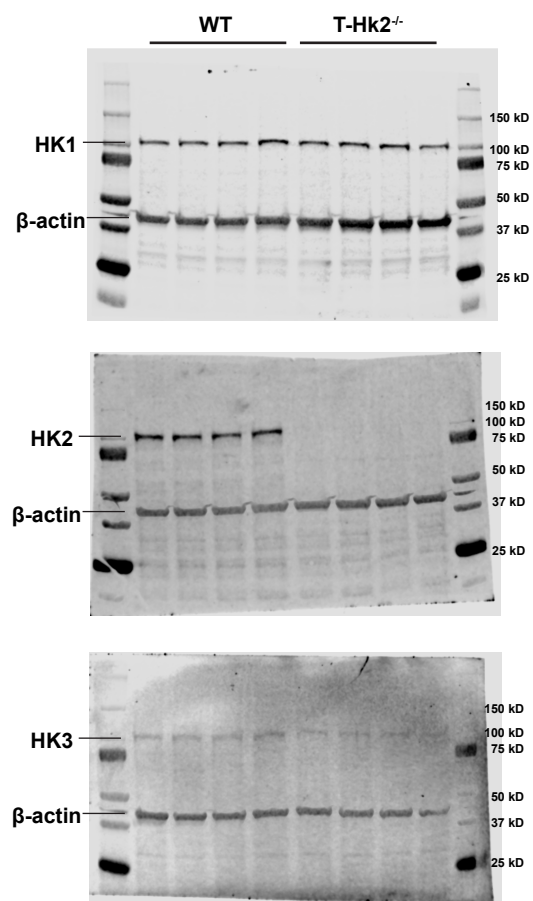

Supplement: 40170_2018_184_MOESM1_ESM.pdf [file 40170_2018_184_MOESM1_ESM.pdf]
